# Supplementary material for: Conditional deletion of neurogenin-3 using Nkx2.1iCre results in a mouse model for the central control of feeding, activity and obesity
Source: PubMed Central journal article supplement (PMC3759333; doi:10.1242/dmm.011916), 2013-05-02
Supplement: supp_011916_DMM011916.pdf [file supp_011916_DMM011916.pdf]

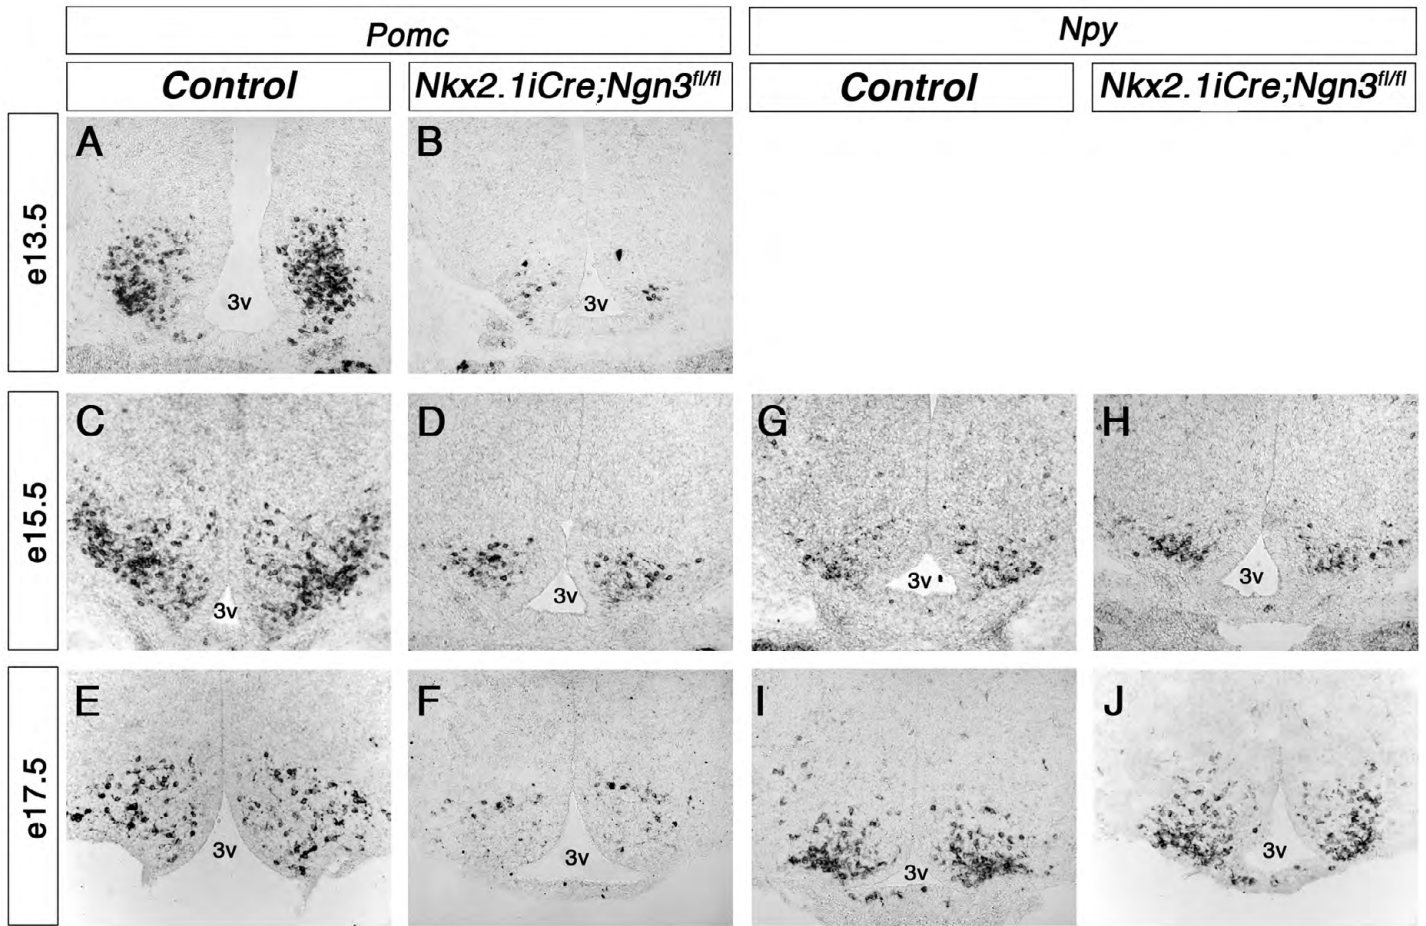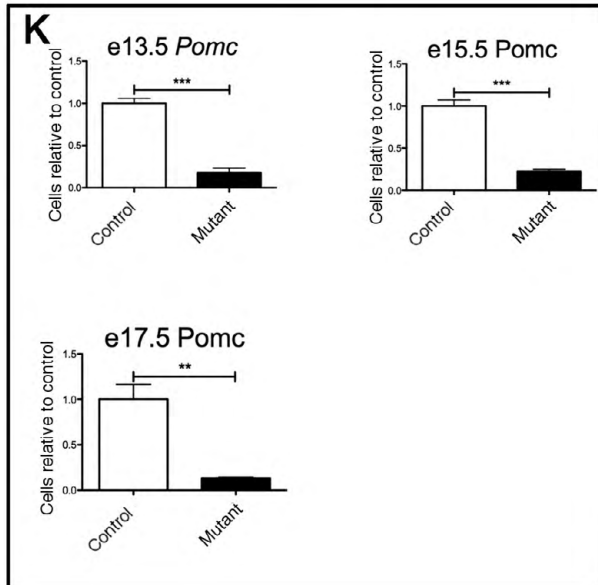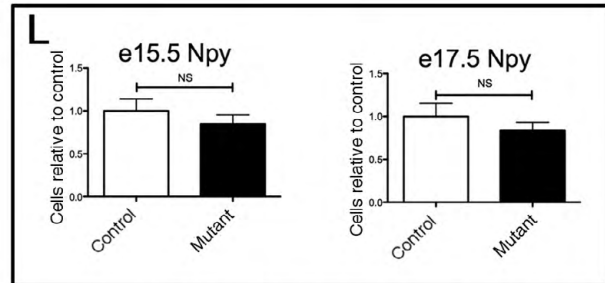

Supplementary Figure1. Expression and quantification by in situ hybridisation of *Pomc* and *Npy* in the developing arcuate nucleus of *Nkx2.1iCre;Ngn3<sup>fl/fl</sup>* and control mice. A-J Anorexigenic *Pomc* expression compared to the control is reduced throughout development of the ARC (A-F), while orexigenic *Npy* expression is unchanged (G-J). K,L. Number of *Pomc*+ cells is reduced by around 80% throughout the development of mutant mice (K) whereas the number of *Npy*+ cells is unchanged (L). Students t-test: NS. No Significance. \*\*  $P < 0.01$ . \*\*\*  $P < 0.005$

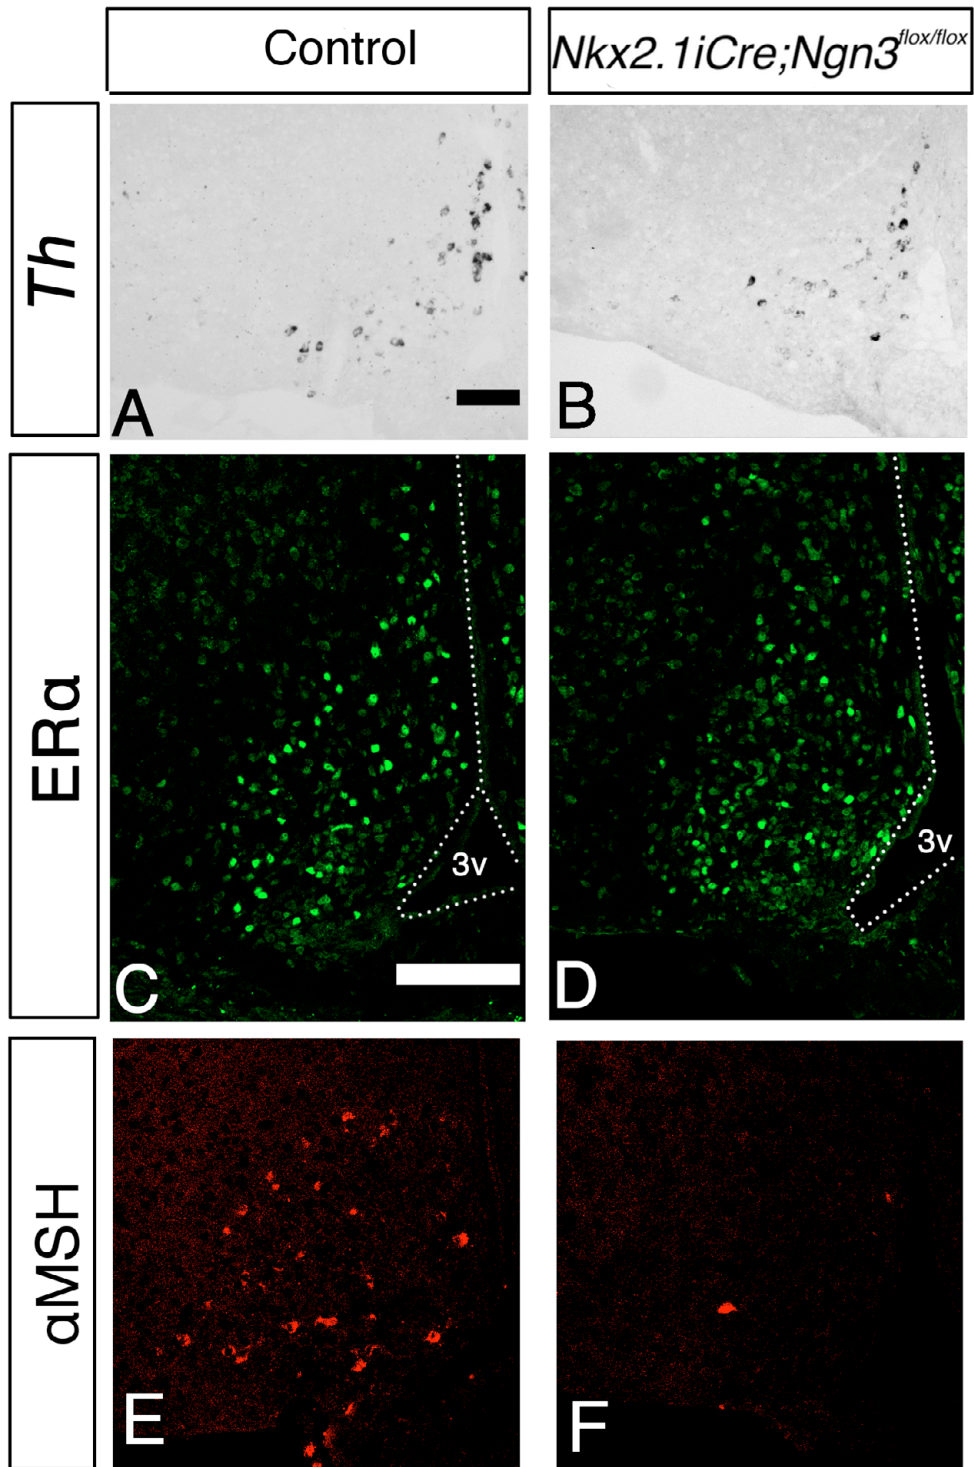

Supplementary Figure 2.

Expression by in situ hybridisation of *Th* and by fluorescence immunohistochemistry of ERα and αMSH in the arcuate nucleus of control and *Nkx2.1Cre;Ngn3<sup>lox/lox</sup>* mice. Expression of *Th* (A,B) and of ERα (C,D) is unaffected in mutant mice, while αMSH expression is largely absent. 3v: 3rd ventricle.
